# Supplementary material for: The association of HIV and easy access to narcotics in Pakistan; calling drug policy makers
Source: PubMed Central journal article supplement (PMC6918682; doi:10.1186/s40545-019-0199-5), 2019-12-18
Supplement: 40545_2019_199_MOESM1_ESM.pdf [file 40545_2019_199_MOESM1_ESM.pdf]

All records and register shall be maintained in accordance with the laws in force

Any container taken from the poison cup board shall be replaced therein immediately after use and the cupboard locked. The keys of the poison cupboard shall be kept in the personal custody of the responsible person.

Drugs when supplied shall have labels conforming to the provisions of laws in force.

**Note;** The above requirements are subject to modification or the directions of the Licensing Authority, if the Authority is of the opinion that having regards to the nature of drugs dispensed, compounded or prepared by the licensee it is necessary to relax the above requirements in the circumstances of a particular case.

=====

### Schedule G

[See rule 20(1)(e)]

#### DRUGS NOT TO BE SOLD/STORED BY LICENCEE IN FORM NO.10

1. **Antileprosy**
  - i Rifampicin Injection iv Ethionamide
  - ii Dapsone v Prothionemide
  - iii Clofazimine
2. **immunological products, Vaccines, Sera / Anti Sera**
  - i Anthrax Vaccine ix Rubella Vaccine
  - ii BCG Vaccine x Pneumococcal vaccine
  - iii Botulisms Antitoxin xi Poliomyelitis Vaccine
  - iv Cholera Vaccine xii Smallpox Vaccine
  - v Diphtheria Vaccine xiii Typhoid Vaccine
  - vi Influenza Vaccine xiv Immunoglobulins
  - vii Measles Vaccine xv Rabies Vaccine
  - viii MMR Vaccine xvi Homophiles Influenza-Type B Vaccine
3. **Products Related with Malignant Diseases and Immunosuppression**
  - i Folinic Acid xiii Mitozantrone
  - ii Doxorubicin HCl xiv Methotrexate
  - iii Mercaptopurine xv Vinblastine
  - iv Thioguanine xv Carboplatin
  - v Vincristine xvii Bleoimycin
  - vi Cisplastin xviii Dactinomycin
  - vii Busulphan xix Chlorambucil
  - viii Carmustine xx Dacarbazine
  - ix Lomustine xxi Amasacrine
  - x Cyclophosphamide xxii Azathioprine
  - xi Melphalan xxiii Cyclosporin etc
  - xii Fluorouracil
4. **Drugs of Anesthesia and Inhalation Anesthetics**
  - i Propofol viii Mitazolam
  - ii Enfluran ix Naloxone Hcl
  - iii Isofluran xv Vancuronium
  - iv Halothane xi Pancuronium
  - v Bupivacain xii Tubocuraine
  - vi Thiopentone xiii Suxamethonium
  - vii Benzodiazepine xiv Neostigmine

|                                                                 |                      |        |                       |
|-----------------------------------------------------------------|----------------------|--------|-----------------------|
| <b>5. Antibiotics</b>                                           |                      |        |                       |
| i                                                               | Spectinomycin        | ii     | Vancomycin            |
| iii                                                             | Teicoplanon          | iv     | Colistin              |
| v                                                               | Sodium Fusidate      | vi     | Imipenem              |
| <b>6. Inotropics</b>                                            |                      |        |                       |
| i                                                               | Primacor             | ii     | Milrinone             |
| iii                                                             | Enoximone            |        |                       |
| <b>7. Injection Prostaglandins</b>                              |                      |        |                       |
| i                                                               | Dinoprostone         | ii     | Carboprost            |
| iii                                                             | Gemeprost            |        |                       |
| <b>8. Alpha Blocker</b>                                         |                      |        |                       |
| i                                                               | Prazosin HCl         | ii     | Indoramine            |
| iii                                                             | Daxazosing           | iv     | Alfuzosin             |
| <b>9. Biotechnological Products</b>                             |                      |        |                       |
| i                                                               | Interferon           | ii     | Erythropoetin         |
| <b>10. Narcotics, Psychotropic / Tri Cyclic Anti Depressant</b> |                      |        |                       |
| i                                                               | Morphine             | xviii  | Chlorpromazine        |
| ii                                                              | Buprenorphine        | xix    | Meprobamate           |
| iii                                                             | Nalbuphine           | xx     | Chlordiazepoxide      |
| iv                                                              | Fantanil             | xxi    | Alprozolam            |
| v                                                               | Pethidine            | xxii   | Clonazepam            |
| vi                                                              | Lorazepam            | xxiii  | Flurazepam            |
| vii                                                             | Temazepam            | xxiv   | Loprazolam            |
| viii                                                            | Oxazepam             | xxv    | Dothiepin             |
| ix                                                              | Amoxapine            | xxvi   | Doxepin               |
| x                                                               | Iprine Dole Codine   | xxvii  | Nortriptyline         |
| xi                                                              | Pentazocine          | xxviii | Trimipramine          |
| xii                                                             | Phenelzine           | xxix   | Tranycypromine        |
| xiii                                                            | Lithium              | xxx    | Flupenthixol          |
| xiv                                                             | Dextropropoxyphene   | xxxii  | Tryptophan            |
| xv                                                              | Clomipramine         | xxxiii | Imipramine            |
| xvi                                                             | Mianserin            |        | Amipriptyline etc     |
| xvii                                                            | Maprotiline          |        |                       |
| <b>11. Antiviral</b>                                            |                      |        |                       |
| i                                                               | Acyclovir            | Vii    | Idoxuridine           |
| ii                                                              | Amantadine HCl       | viii   | Ribavirin             |
| iii                                                             | Famciclovir          | ix     | Vidarabin             |
| iv                                                              | Inosine Pranolsex    | x      | Trifluridine          |
| v                                                               | Zidovudine           | xi     | Methisozone etc       |
| vi                                                              | Ganciclovir          |        |                       |
| <b>12. Thrombolytic Enzymes</b>                                 |                      |        |                       |
| i                                                               | Alteplase            | ii     | Anislreplase          |
| iii                                                             | Streptokinase        | iv     | Urokinase             |
| <b>13. Product Used in Dialysis</b>                             |                      |        |                       |
| i                                                               | Peritoneal Dialysis  | & ii   | Lysine Solution       |
|                                                                 | Haemodialysis        |        | (Irrigation Solution) |
| iii                                                             | Hyper tonic Solution | iv     | Isotonic Solution     |
| <b>14. Creams and aerosols Steroidal Preparations</b>           |                      |        |                       |
| i                                                               | Prednisolone         | ii     | Methylprednislone     |
| iii                                                             | Tramcionolone        | iv     | Dexamethasone         |
| v                                                               | Beclomethasone       | vi     | Hydrocortisone        |
| <b>15. Hormones</b>                                             |                      |        |                       |
| i                                                               | Vasopressin          | vi     | Finasteride           |

|     |              |      |              |
|-----|--------------|------|--------------|
| ii  | Desmopressin | vii  | Finasteride  |
| iii | Stanozolol   | viii | Somatropin   |
| iv  | Nandrolone   | ix   | Testosterone |
| v   | Mesterolone  | x    | Progestogens |
